# Supplementary material for: k-mer approaches for biodiversity genomics
Source: HighWire-hosted journal article supplement (doi:10.1101/gr.279452.124), 2025-01-31
Supplement: Supplemental_Table_S1.pdf [file Supplemental_Table_S1.pdf]

**Supplemental Table S1: Overview of selected *k*-mer counting tools and tool kits**

The is not an exhaustive list of *k*-mer counting tools, but an overview of those that are either historically or currently impactful. Most of the tools have their own specialised utilities no other tools does - all of them were developed with a clear intention. For references, see Supplemental Materials.

| <i>Tool<br/>Year</i>      | <i>description</i>                                                                                                                                                                                             | <i>url</i>                                                                                         | <i>reference</i> |
|---------------------------|----------------------------------------------------------------------------------------------------------------------------------------------------------------------------------------------------------------|----------------------------------------------------------------------------------------------------|------------------|
| <i>Jellyfish<br/>2011</i> | <i>Very popular and easy to use k-mer counter, but substantially slower compared to more recent k-mer counters</i>                                                                                             | <i><a href="https://github.com/gmarcais/Jellyfish">https://github.com/gmarcais/Jellyfish</a></i>   | <i>[7]</i>       |
| <i>Khmer<br/>2015</i>     | <i>A versatile k-mer suite that allow k-mer indexing, streaming and building de Bruijn graphs</i>                                                                                                              | <i><a href="https://github.com/dib-lab/khmer">https://github.com/dib-lab/khmer</a></i>             | <i>[8]</i>       |
| <i>KAT<br/>2016</i>       | <i>k-mer counter that is also able to compare two libraries or a library and a genome, powerful diagnostic plots of k-mer composition vs coverage</i>                                                          | <i><a href="https://github.com/TGAC/KAT">https://github.com/TGAC/KAT</a></i>                       | <i>[9]</i>       |
| <i>ntCard<br/>2017</i>    | <i>Very fast, k-mer cardinality estimator. The k-mer histogram is a fast approximation and limited to non-repetitive portion of the genome</i>                                                                 | <i><a href="https://github.com/bcgsc/ntCard">https://github.com/bcgsc/ntCard</a></i>               | <i>[10]</i>      |
| <i>KMC3<br/>2017</i>      | <i>Very fast explicit k-mer with the capacity to calculate any arbitrary coverages users request by parameters; Interface is a bit more complex</i>                                                            | <i><a href="https://github.com/resh-bio/KMC">https://github.com/resh-bio/KMC</a></i>               | <i>[11]</i>      |
| <i>Meryl<br/>2020</i>     | <i>A counter that also implements efficient operations between sets of k-mers, like union, intersection, subtraction. Used by Merqury.</i>                                                                     | <i><a href="https://github.com/marbl/meryl">https://github.com/marbl/meryl</a></i>                 | <i>[12]</i>      |
| <i>FASTK<br/>2023</i>     | <i>The fastest explicit k-mer counter, compatible with all the existing downstream tools; using a shortcut to aggregate all repetitive k-mers (explicitly counting only to <math>2^{16}</math>x coverage).</i> | <i><a href="https://github.com/the-genemyers/FASTK">https://github.com/the-genemyers/FASTK</a></i> | <i>[13,14]</i>   |
