# Supplementary material for: k-mer approaches for biodiversity genomics
Source: HighWire-hosted journal article supplement (doi:10.1101/gr.279452.124), 2025-01-31
Supplement: Supplemental_Table_S2.pdf [file Supplemental_Table_S2.pdf]

**Supplemental Table S2: List of selected genome profiling tools.**

For references, see Supplemental Materials.

| <i>Tool</i>            | <i>description</i>                                                                                                                | <i>url</i>                                                                                              | <i>reference</i> |
|------------------------|-----------------------------------------------------------------------------------------------------------------------------------|---------------------------------------------------------------------------------------------------------|------------------|
| <i>Kmerfreq</i>        | <i>Estimates genome size from corrected long reads.</i>                                                                           | <a href="https://github.com/fanagislab/kmerfreq">https://github.com/fanagislab/kmerfreq</a>             | [15] [16]        |
| <i>RESPECT</i>         | <i>Primarily for skimming data; ignores the concept of heterozygosity and is pre-trained on haploid representation of genomes</i> | <a href="https://github.com/shahab-sarmashghi/RESPECT">https://github.com/shahab-sarmashghi/RESPECT</a> | [17]             |
| <i>findGSE</i>         | <i>Modelling k-mer coverage with the most complex distribution of all methods - skew normal distributionl,</i>                    | <a href="https://github.com/schneebergerlab/findGSE">https://github.com/schneebergerlab/findGSE</a>     | [16,18]          |
| <i>tetmer</i>          | <i>focused on polyploids; based on coalescence theory</i>                                                                         | <a href="https://github.com/hannesbecher/shiny-k-mers">https://github.com/hannesbecher/shiny-k-mers</a> | [19]             |
| <i>GenomeScope</i>     | <i>using combinatorics and probability;</i>                                                                                       | <a href="https://genomescope.org">https://genomescope.org</a>                                           | [20]             |
| <i>GenomeScope 2.0</i> | <i>using combinatorics and probability; enhanced model accommodates polyploids; fit to transformed k-mer spectra</i>              | <a href="https://genomescope.org/genomescope2.0/">https://genomescope.org/genomescope2.0/</a>           | [13]             |
| <i>CovEst</i>          |                                                                                                                                   | <a href="https://github.com/mhazza/covest">https://github.com/mhazza/covest</a>                         | [21]             |
